# Supplementary material
Source: PubMed Central journal article supplement (PMC2787150)
Supplement: 0907916106_ST2_PDF.pdf [file 0907916106_ST2_PDF.pdf]

**Table S2. Subset of candidate MEX-3 mRNA targets**

| Gene           | Transcript ID | Function                                   | Sites |
|----------------|---------------|--------------------------------------------|-------|
| <i>ced-3</i>   | C48D1.2       | protease required for apoptosis            | 4     |
| <i>cpb-1</i>   | C40H1.1       | CPEB protein                               | 2     |
| <i>cpb-3</i>   | B0414.5       | CPEB protein                               | 3     |
| <i>cye-1</i>   | C37A2.4b      | Cyclin E/G1 cell cycle regulator           | 2     |
| <i>daz-1</i>   | F56D1.7       | RNA binding protein                        | 1     |
| <i>fog-3</i>   | C03C11.2      | sex determination                          | 1     |
| <i>gld-1</i>   | T23G11.3      | RNA binding protein                        | 3     |
| <i>glh-3</i>   | B0414.6       | germline RNA helicase                      | 2     |
| <i>glh-4</i>   | T12F5.3.1     | germline RNA helicase                      | 2     |
| <i>glp-1</i>   | F02A9.6       | NOTCH receptor                             | 2     |
| <i>gna-2</i>   | T23G11.2      | Glucosamine phosphate N-Acetyl transferase | 1     |
| <i>him-3</i>   | ZK381.1       | sex determination                          | 2     |
| <i>let-711</i> | F57B9.2       | mRNA deadenylation                         | 3     |
| <i>mes-3</i>   | F54C1.3a      | X chromosome silencing                     | 1     |
| <i>mes-6</i>   | C09G4.5       | X chromosome silencing                     | 1     |
| <i>mex-3</i>   | F53G12.5b     | RNA binding protein                        | 2     |
| <i>mig-5</i>   | T05C12.6b     | dishevelled homolog/Wnt signalling         | 1     |
| <i>mom-4</i>   | F52F12.3      | Wnt signalling                             | 2     |
| <i>nos-2</i>   | ZK1127.1      | Nanos homologue                            | 2     |
| <i>nst-1</i>   | K01C8.9       | larval germline proliferation              | 1     |
| <i>ooc-3</i>   | B0334.11a     | axis polarity determinant                  | 1     |
| <i>pal-1</i>   | C38D4.6a.2    | Caudal homeodomain protein                 | 2     |
| <i>pha-4</i>   | F38A6.1a      | FoxA transcription factor/pharynx          | 1     |
| <i>puf-3</i>   | Y45F10A.2.1   | RNA binding protein                        | 1     |
| <i>puf-6</i>   | F18A11.1.1    | RNA binding protein                        | 1     |
| <i>puf-7</i>   | B0273.2.1     | RNA binding protein                        | 1     |
| <i>sox-2</i>   | K08A8.2a.1    | HMG-box transcription factor               | 1     |
| <i>spe-41</i>  | K01A11.4.2    | spermatogenesis                            | 1     |
| <i>spn-4</i>   | ZC404.8.1     | RNA binding protein                        | 1     |
| <i>tbx-2</i>   | F21H11.3.2    | T-box transcription factor/phayrnx         | 1     |
| <i>tra-2</i>   | C15F1.3a.1    | sex determination                          | 3     |
| <i>ubc-9</i>   | F29B9.6.1     | ubiquitin-conjugating enzyme               | 4     |

A list of candidate regulatory targets of MEX-3 involved in germline and/or early development in *C. elegans*. The number of MRE sites within the 3'UTR of each gene is listed.
