# Supplementary material
Source: PubMed Central journal article supplement (PMC2787150)
Supplement: 0907916106_ST3_PDF.pdf [file 0907916106_ST3_PDF.pdf]

**Table S3. Results from the *mex-3* RNAi screen**

| Strain/<br>ID                 | Function                         | OP50 worms<br>imaged                      | MEX-3 RNAi<br>worms imaged                | GFP<br>expression<br>in Seydoux<br>3'UTR<br>fusions | Observations                                                                                                                                                             |
|-------------------------------|----------------------------------|-------------------------------------------|-------------------------------------------|-----------------------------------------------------|--------------------------------------------------------------------------------------------------------------------------------------------------------------------------|
| <i>gld-1</i><br>JH2436        | RNA binding<br>protein           | 13                                        | 8                                         | Pachytene                                           | No change in GFP expression<br>between MEX-3 RNAi and OP50<br>worms                                                                                                      |
| <i>spn-4</i><br>JH2311        | RNA binding<br>protein           | 14 (embryos<br>imaged; 2-4<br>cell stage) | 11 (embryos<br>imaged; 2-4<br>cell stage) | Oocytes                                             | No change in GFP expression<br>between MEX-3 RNAi and OP50<br>worms                                                                                                      |
| <i>glp-1</i><br><i>sprSi2</i> | Notch receptor                   | 40                                        | 37                                        | Progenitors                                         | Observed an increase in GFP<br>expression in MEX-3 RNAi oocytes<br>(27/37) and early embryos ( $n = 41$ )<br>compared to OP50 oocytes (4/40) and<br>embryos ( $n = 43$ ) |
| <i>pal-1</i><br>JH2236        | Caudal<br>homeodomain<br>protein | 15 (embryos<br>imaged; 2-4<br>cell stage) | 13 (embryos<br>imaged; 2-4<br>cell stage) | Oocytes                                             | Observed GFP expression in MEX-3<br>RNAi early embryos; low expression<br>in OP50 early embryos compared to<br>MEX-3 RNAi                                                |
| <i>daz-1</i><br>JH2223        | RNA binding<br>protein           | 13                                        | 16                                        | Progenitors                                         | No change in GFP expression<br>between MEX-3 RNAi and OP50<br>worms                                                                                                      |
| <i>cye-1</i><br>JH2261        | E/G1 cell cycle<br>regulator     | 17                                        | 11                                        | Mixed                                               | No change in GFP expression<br>between MEX-3 RNAi and OP50<br>worms                                                                                                      |
| <i>him-3</i><br>JH2324        | Sex determination                | 10                                        | 9                                         | Pachytene                                           | No change in GFP expression<br>between MEX-3 RNAi and OP50<br>worms                                                                                                      |
| <i>mes-3</i><br>JH2377        | X chromosome<br>silencing        | 11                                        | 15                                        | Mixed                                               | No change in GFP expression<br>between MEX-3 RNAi and OP50<br>worms                                                                                                      |
| <i>spe-41</i><br>JH2381       | Spermatogenesis                  | 7                                         | 10                                        | Sperm                                               | No change in GFP expression<br>between MEX-3 RNAi and OP50<br>worms                                                                                                      |
| <i>fog-2</i><br>JH2207        | Feminization of<br>germline      | 10                                        | 12                                        | Ubiquitous                                          | No change in GFP expression<br>between MEX-3 RNAi and OP50<br>worms                                                                                                      |
